# Supplementary material for: Antibody Response to HERV-K and HERV-W Envelope Epitopes in Patients with Myasthenia Gravis
Source: MDPI journal article supplement (doi:10.3390/ijms25010446), 2023-12-28
Supplement: s1 [file s1]

## Supplementary material

Analysis of humoral response in MG subgroups categorized as MG AChR Ab+, MG MuSK Ab+, and MG Double Seronegative (MG-DSN). Each patient was specifically matched with one control subject based on gender and age.

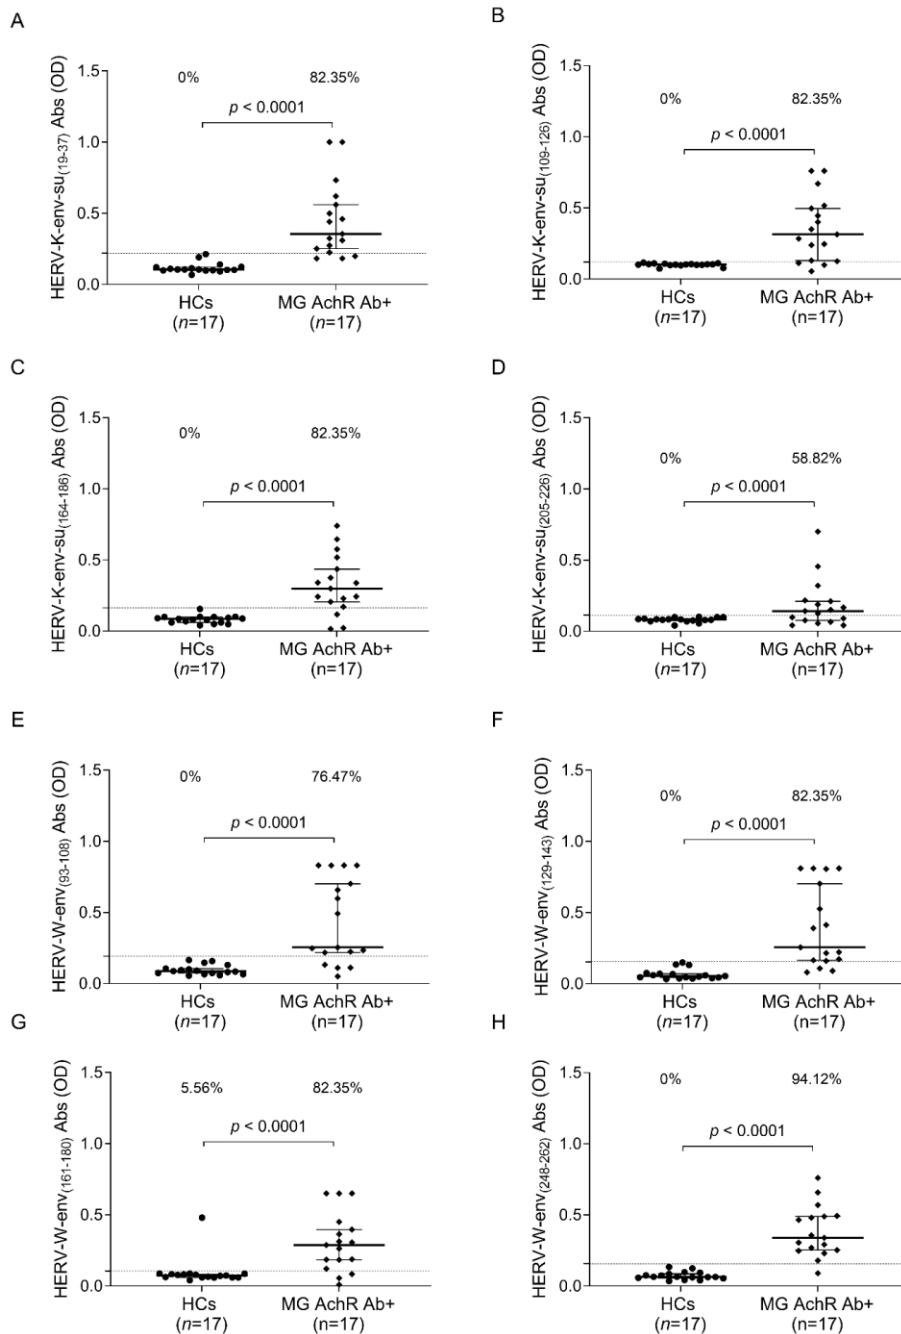

**Figure S1.** ELISA-based analysis of Abs reactivity against HERV-K-env-su and HERV-W-env-su derived peptides. Plasma samples from the MG-AChR Ab+ patients and HCs subjects were tested against HERV-K-env-su<sub>(19-37)</sub>(A), HERV-K-env-su<sub>(109-126)</sub> (B), HERV-K-env-su<sub>(164-186)</sub> (C), HERV-K-env-su<sub>(205-226)</sub> (D), HERV-W-env-su<sub>(93-108)</sub> (E), HERV-K-env-su<sub>(129-143)</sub> (F), HERV-K-env-su<sub>(161-180)</sub> (G) and HERV-K-env-su<sub>(248-262)</sub> (H) peptides. The median and dashed lines delineate the thresholds employed to determine sample positivity. The upper section of each graph displays the *p*-value and the proportion of positive patients, as determined by Fisher's exact test.

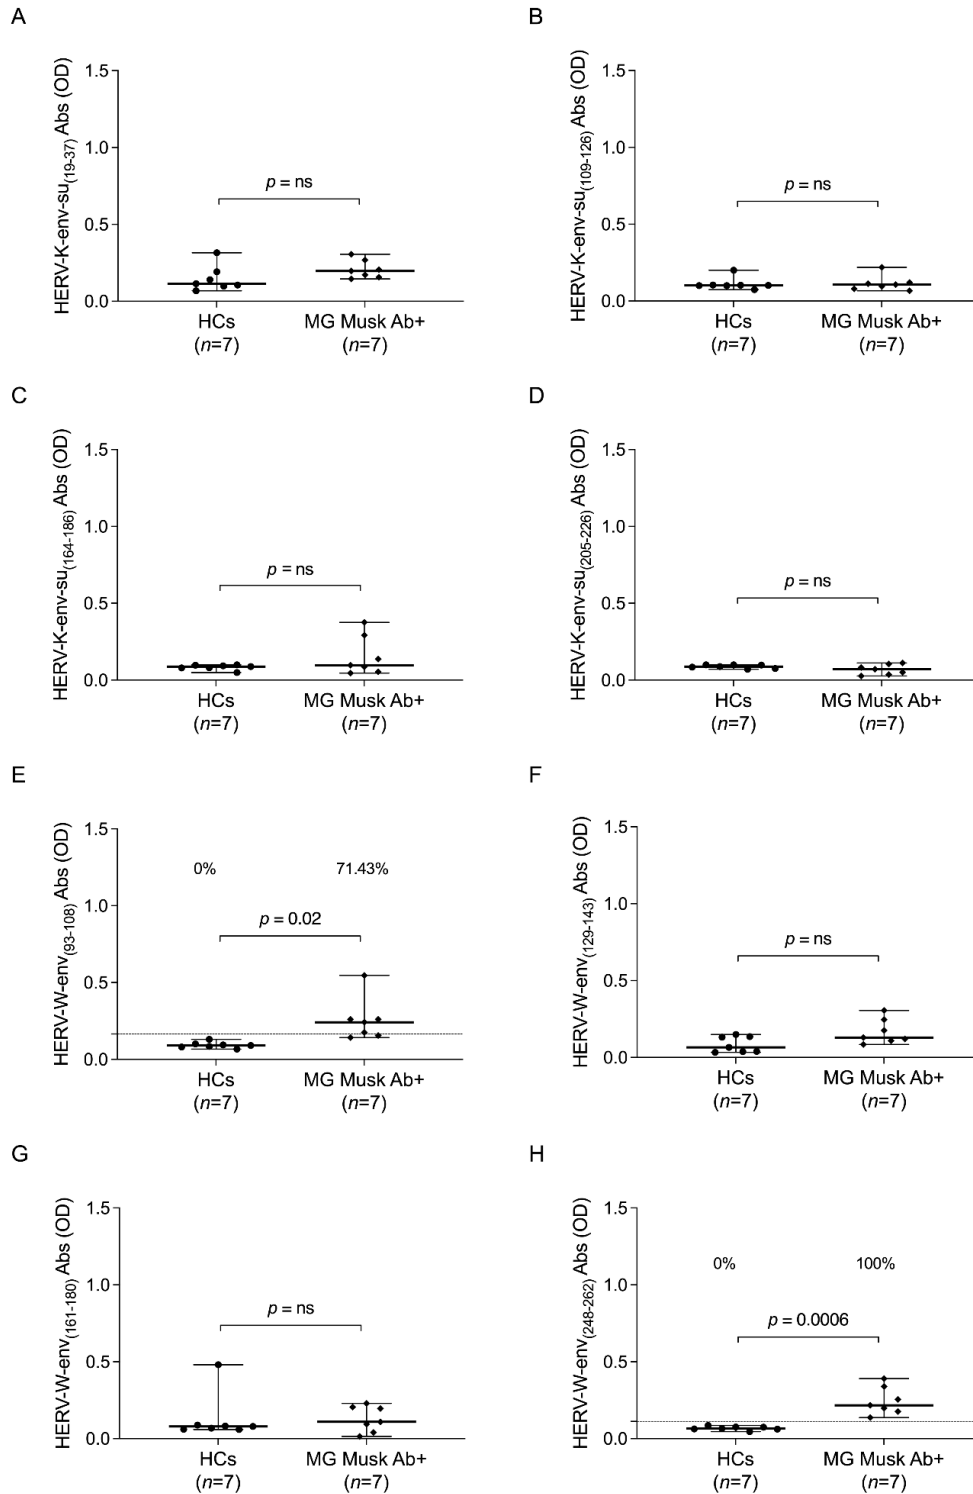

**Figure S2.** ELISA-based analysis of Abs reactivity against HERV-K-env-su and HERV-W-env-su derived peptides. Plasma samples from the MG-Musk Ab<sup>+</sup> patients and HCs subjects were tested against HERV-K-env-su<sub>(19-37)</sub>(A), HERV-K-env-su<sub>(109-126)</sub> (B), HERV-K-env-su<sub>(164-186)</sub> (C), HERV-K-env-su<sub>(205-226)</sub> (D), HERV-W-env-su<sub>(93-108)</sub> (E), HERV-K-env-su<sub>(129-143)</sub> (F), HERV-K-env-su<sub>(161-180)</sub> (G) and HERV-K-env-su<sub>(248-262)</sub> (H) peptides. The median and dashed lines delineate the thresholds employed to determine sample positivity. The upper section of each graph displays the  $p$ -value and the proportion of positive patients, as determined by Fisher's exact test.

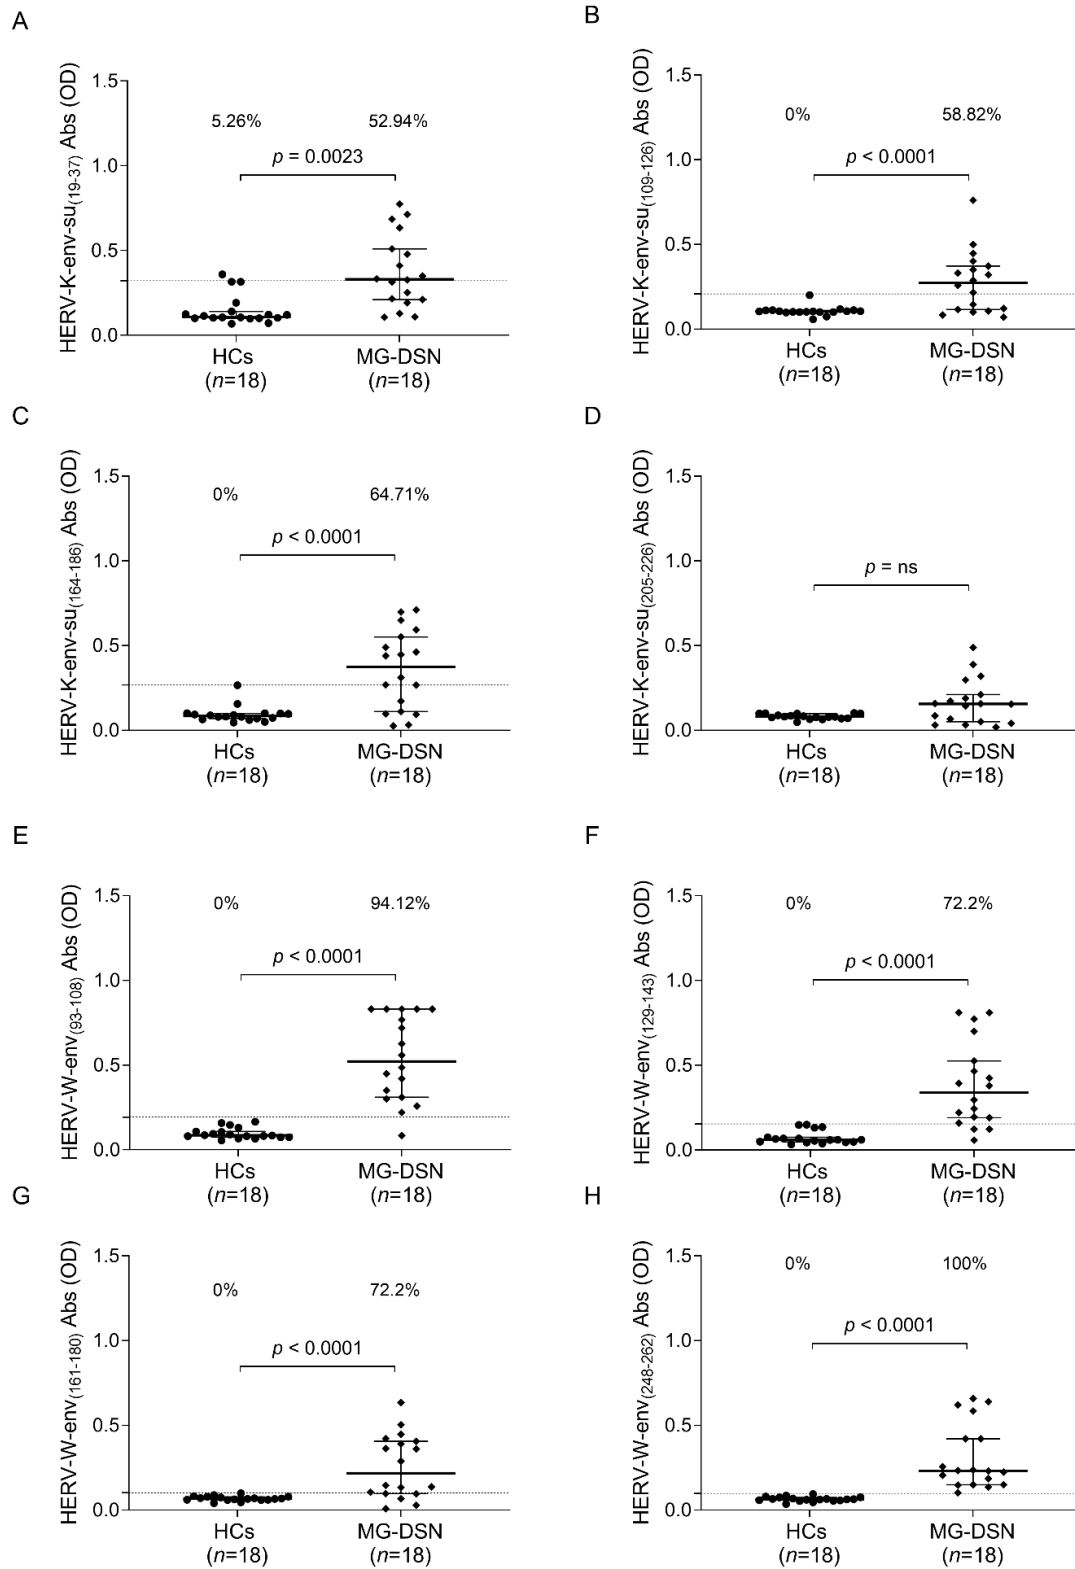

**Figure S3.** ELISA-based analysis of Abs reactivity against HERV-K-env-su and HERV-W-env-su derived peptides. Plasma samples from the MG-DSN patients and HCs subjects were tested against HERV-K-env-su<sub>(19-37)</sub>(A), HERV-K-env-su<sub>(109-126)</sub> (B), HERV-K-env-su<sub>(164-186)</sub> (C), HERV-K-env-su<sub>(205-226)</sub> (D), HERV-W-env-su<sub>(93-108)</sub> (E), HERV-K-env-su<sub>(129-143)</sub> (F), HERV-K-env-su<sub>(161-180)</sub> (G) and HERV-K-env-su<sub>(248-262)</sub> (H) peptides. The median and dashed lines delineate the thresholds employed to determine sample positivity. The upper section of each graph displays the *p*-value and the proportion of positive patients, as determined by Fisher's exact test.
